# Supplementary material
Source: MDPI journal article supplement (https://www.mdpi.com/2304-6767/11/6/150)
Supplement: s1 [file s1]

## Supplementary Material

**Supplementary Table S1.** Quality assessment of the cohort studies via the Newcastle–Ottawa Scale (NOS).

| Author,<br>year                     | Selection                                      |                                                  |                              |                                                                                               | Comparability                                                                 |                           | Outcome                                                        |                                        | Score |
|-------------------------------------|------------------------------------------------|--------------------------------------------------|------------------------------|-----------------------------------------------------------------------------------------------|-------------------------------------------------------------------------------|---------------------------|----------------------------------------------------------------|----------------------------------------|-------|
|                                     | Representativeness<br>of the exposed<br>cohort | Selection<br>of the<br>non-<br>exposed<br>cohort | Ascertainment<br>of exposure | Demonstration that the<br>outcome of interest was not<br>present at the start of the<br>study | On the basis of<br>the design or<br>analysis<br>controlled for<br>confounders | Assessment<br>of outcomes | Follow-up<br>was long<br>enough<br>for<br>outcomes<br>to occur | Adequacy of<br>following up<br>cohorts |       |
| Block et al.<br>[21] (2017)         | *                                              | *                                                | *                            | *                                                                                             | **                                                                            | *                         | *                                                              | *                                      | 9/9   |
| Dong Wu<br>et al. [46]<br>2020      | *                                              | *                                                | *                            | *                                                                                             | *                                                                             | *                         | *                                                              | *                                      | 8/9   |
| Ting-Mao<br>Sun et al.<br>[35] 2020 | *                                              | *                                                | *                            | *                                                                                             | *                                                                             | *                         | *                                                              | *                                      | 8/9   |

**Supplemental Table S2.** Quality assessment of the randomized clinical trials via the Cochrane scale.

| Author, year                         | Random sequence generator | Allocation concealment | Blinding of participants and personnel | Blinding of assessment of the outcomes | Incomplete outcome data | Selective reporting | Other sources of bias | Overall risk of bias |
|--------------------------------------|---------------------------|------------------------|----------------------------------------|----------------------------------------|-------------------------|---------------------|-----------------------|----------------------|
| Farley et al. [36] 2013              | Moderate                  | Low                    | Low                                    | Low                                    | Low                     | Low                 | Moderate              | Moderate             |
| Pei Shen et al. [50] 2015            | Moderate                  | Low                    | Low                                    | Low                                    | Low                     | Low                 | Low                   | Moderate             |
| Faris Younes et al. [41] 2018        | Low                       | Low                    | Low                                    | Low                                    | Low                     | Low                 | Low                   | Low                  |
| Keskanya Subbalekha et al. [42] 2019 | Low                       | Low                    | Low                                    | Low                                    | Moderate                | Low                 | Low                   | Moderate             |
| Magrin et al. [43]2019               | Low                       | Low                    | Low                                    | Low                                    | Low                     | Low                 | Low                   | Low                  |
| Palita Smitkarn et al. [45] 2019     | Low                       | Low                    | Low                                    | Low                                    | Low                     | Low                 | Low                   | Low                  |
| Aktolun Aydemir et al. [37] 2020     | Low                       | Low                    | Low                                    | Low                                    | Low                     | Low                 | Moderate              | Moderate             |
| Paweena Yimarj et al. [47] 2020      | Moderate                  | Low                    | Low                                    | Low                                    | Low                     | Low                 | Low                   | Moderate             |

**Supplementary Table S3.** Quality assessment of the case series via the Robins-I Scale.

| Study                              | <u>Before the intervention</u> | <u>During the intervention</u>                     | <u>After the intervention</u>              | <u>Overall risk of bias</u>                           |                          |                                     |                                           | <u>Overall risk of bias</u> |
|------------------------------------|--------------------------------|----------------------------------------------------|--------------------------------------------|-------------------------------------------------------|--------------------------|-------------------------------------|-------------------------------------------|-----------------------------|
|                                    | Bias due to confounding        | Bias in the selection of participants in the study | Bias in classification of the intervention | Bias due to deviation from the intended interventions | Bias due to missing data | Bias in measurement of the outcomes | Bias in selection of the reported results |                             |
| Elian et al. [51] (2008)           | Moderate                       | Moderate                                           | Low                                        | Low                                                   | Low                      | Low                                 | Low                                       | Moderate                    |
| Ahmet Ersan Ersoy et al. [40] 2008 | Low                            | Low                                                | Low                                        | Low                                                   | Low                      | Low                                 | Low                                       | Low                         |
| Oguz Ozan et al. [52] 2009         | Modderate                      | Moderate                                           | Low                                        | Low                                                   | Low                      | Low                                 | Low                                       | Moderate                    |
| Van Assche et al. [53] 2010        | Moderate                       | Moderate                                           | Low                                        | Low                                                   | Low                      | Low                                 | Low                                       | Moderate                    |
| Platzer et al. [54] 2011           | Moderate                       | Moderate                                           | Low                                        | Low                                                   | Low                      | Low                                 | Low                                       | Moderate                    |
| Fürhauser et al. [55] 2014         | Low                            | Low                                                | Low                                        | Low                                                   | Low                      | Low                                 | Low                                       | Low                         |
| Du-Hyeong Lee et al. [39] 2016     | Moderate                       | Moderate                                           | Low                                        | Low                                                   | Low                      | Low                                 | Low                                       | Moderate                    |
| Schnutenhaus et al. [34](2016)     | Low                            | Low                                                | Low                                        | Low                                                   | Low                      | Low                                 | Low                                       | Low                         |
| Naziri et al. [33] 2016            | Low                            | Low                                                | Low                                        | Low                                                   | Low                      | Low                                 | Low                                       | Low                         |
| Pellegrino et al. [44]2017         | Moderate                       | Moderate                                           | Low                                        | Low                                                   | Low                      | Low                                 | Low                                       | Moderate                    |
| Stefanelli et al. [48]2020         | Low                            | Low                                                | Low                                        | Low                                                   | Low                      | Low                                 | Low                                       | Low                         |
| Stefanelli et al. [49] 2020        | Low                            | Low                                                | Low                                        | Low                                                   | Low                      | Low                                 | Low                                       | Low                         |
| Stefanelli et al. [38] (2020)      | Low                            | Low                                                | Low                                        | Low                                                   | Low                      | Low                                 | Low                                       | Low                         |
